# Supplementary material for: Regulation of voltage-gated potassium channels by PI(4,5)P2
Source: PubMed Central journal article supplement — J Gen Physiol. 2012 Aug;140(2):189–205. doi: 10.1085/jgp.201210806 (PMC3409096; doi:10.1085/jgp.201210806), 2012-08
Supplement: supp_jgp.201210806_JGP_201210806_sm.pdf [file supp_jgp.201210806_JGP_201210806_sm.pdf]

Kruse et al., <http://www.jgp.org/cgi/content/full/jgp.201210806/DC1>

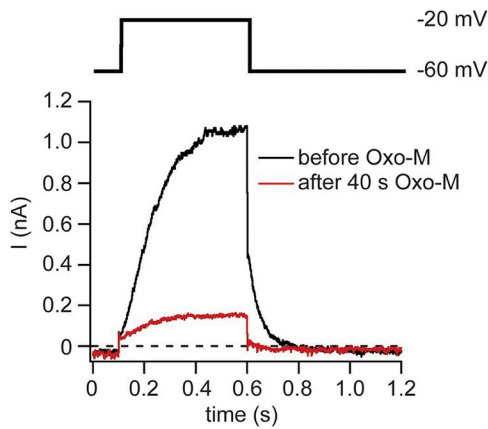

**Figure S1.** Activation of  $M_1R$  strongly decreases  $K_v7.2/K_v7.3$  current amplitudes. Current traces in  $K_v7.2/K_v7.3$  channels coexpressed with  $M_1R$  before Oxo-M (black) and after 40 s application of 10  $\mu M$  Oxo-M (red).

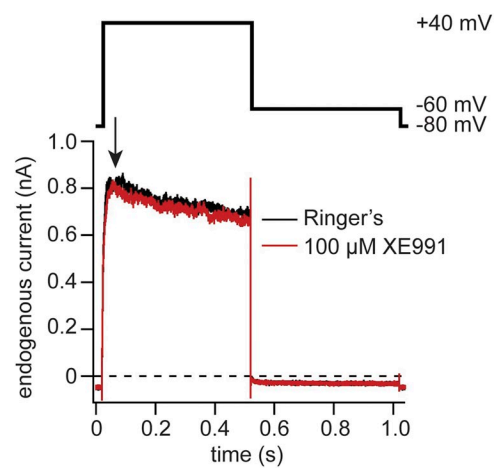

**Figure S2.** Endogenous potassium currents in tsA-201 cells are not blocked by XE991. Endogenous potassium currents in mock-transfected tsA-201 cells were elicited by the pulse protocol given. Black indicates current trace in Ringer's. Red indicates current trace 1 s after the end of a 20-s application of 100  $\mu M$  XE991. With the 40-mV pulse, current amplitudes of endogenous potassium currents were  $1037 \pm 206$  pA ( $n = 5$ , measured at time point indicated by the arrow).

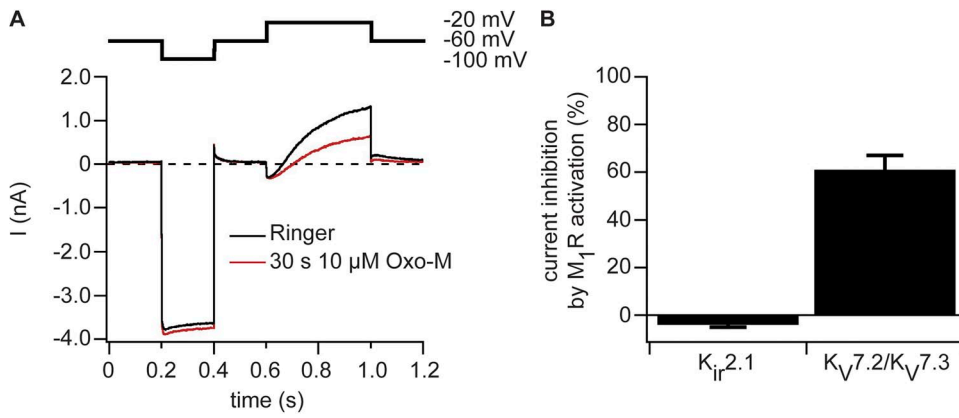

**Figure S3.** Depletion of PI(4,5)P<sub>2</sub> by M<sub>1</sub>R activation inhibits Kv7.2/Kv7.3 channels but not Kir2.1 channels. (A) Kir2.1- and Kv7.2/Kv7.3-mediated currents were recorded before (black) and after activation of M<sub>1</sub>R (red). Pulse protocol is given above current traces. (B) Decrease in Kir2.1- and Kv7.2/Kv7.3-mediated currents after activation of M<sub>1</sub>R ( $n = 5$ ). Error bars represent  $\pm$ SEM.

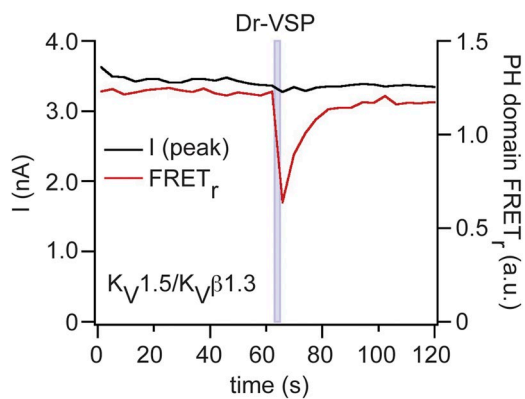

**Figure S4.** PH probes indicate a transient drop of PI(4,5)P<sub>2</sub> levels from VSP activation. To test for a decrease in PI(4,5)P<sub>2</sub> levels after activation of Dr-VSP, we expressed CFP- and YFP-tagged PH probes together with Kv channels and Dr-VSP and monitored changes in FRET ratio as a reporter of changes in PI(4,5)P<sub>2</sub> levels at the plasma membrane. Traces show time courses of FRET ratio (red) in a representative experiment (expression of Kv1.5, Kv $\beta$ 1.3, Dr-VSP, eCFP-PH, and eYFP-PH) together with peak current (black). Bar indicates period of Dr-VSP activation by a 2-s depolarizing pulse to 100 mV. The recovery of FRET ratio after the initial drop indicates PI(4,5)P<sub>2</sub> resynthesis at the plasma membrane. No alteration in peak current amplitude was observed.

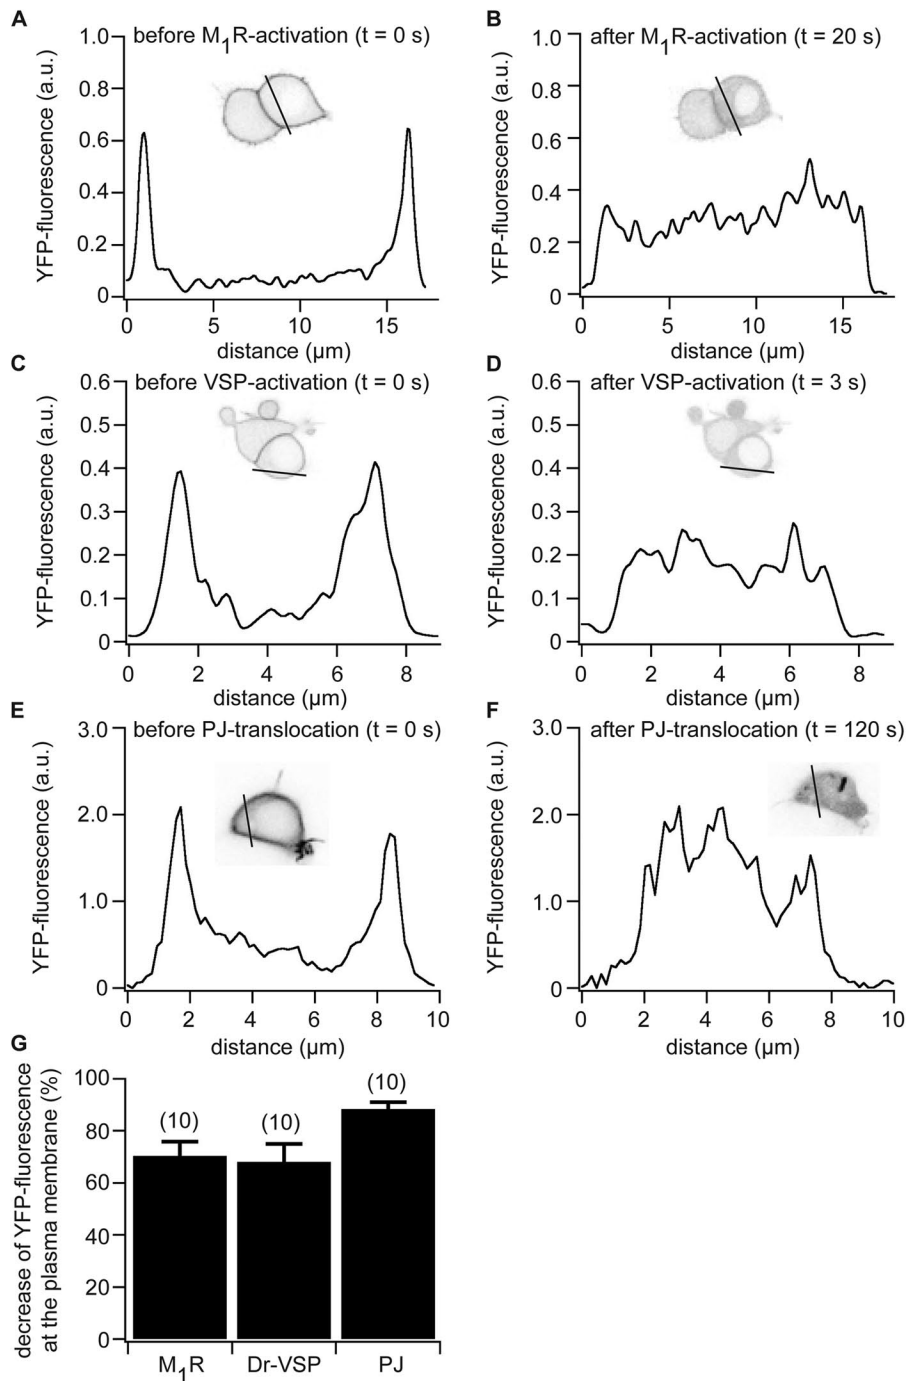

**Figure S5.** Depletion of  $PI(4,5)P_2$  by activation of  $M_1R$  or Dr-VSP or recruitment of pseudojanin leads to translocation of YFP-tagged PH probes from the plasma membrane into the cytoplasm. (A) Line scan measuring YFP fluorescence of a cell expressing YFP-tagged PH probes and  $M_1R$  before activation of the receptor by Oxo-M. (B) Same as in A but after activation of  $M_1R$ . (C-F) Same protocol as in A and B but with coexpression of Dr-VSP (C and D) or pseudojanin (PJ; E and F). Insets show analyzed cells, and black lines indicate area used for the line scan. Plots A-F were generated from the mean of three neighboring line scans for each cell. To compensate for short exposure times, plots A-D were treated with the smooth function of Igor Pro (binomial smooth, setting of 2). (G) Decrease in YFP fluorescence of YFP-tagged PH probes at the plasma membrane after activation of  $M_1R$ , Dr-VSP, or pseudojanin. Numbers in parentheses indicate individual experiments. Error bars represent  $\pm$ SEM.

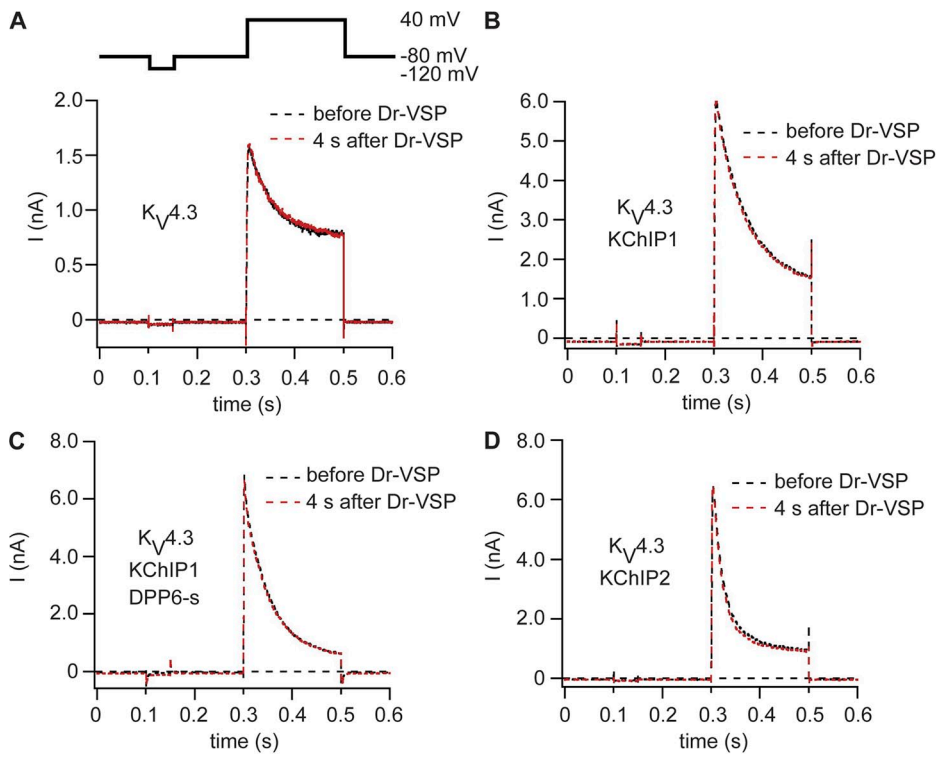

**Figure S6.** Activation of Dr-VSP shows insensitivity of  $K_v4.3$  channels to depletion of  $PI(4,5)P_2$ . (A) Current traces of a cell expressing  $K_v4.3$  and Dr-VSP. Black indicates before activation of Dr-VSP, and red indicates 4 s after activation of Dr-VSP. (B–D) Same protocol as in A but with coexpression of  $KChIP1$  (B),  $KChIP1$  and  $DPP6-s$  (C), or  $KChIP2$  (D).
